# Supplementary material
Source: Springer Nature journal article supplement (https://www.springermedizin.de/resource/supplementary/12916_2006_91_MOESM6_ESM.pdf/9599156)
Supplement: MOESM6 [file 9599156]

negative control

control

Z-VAD-fmk

green tea 0.4%

green tea 0.4% + Z-VAD-fmk

black tea 0.4%

black tea 0.4% + Z-VAD-fmk

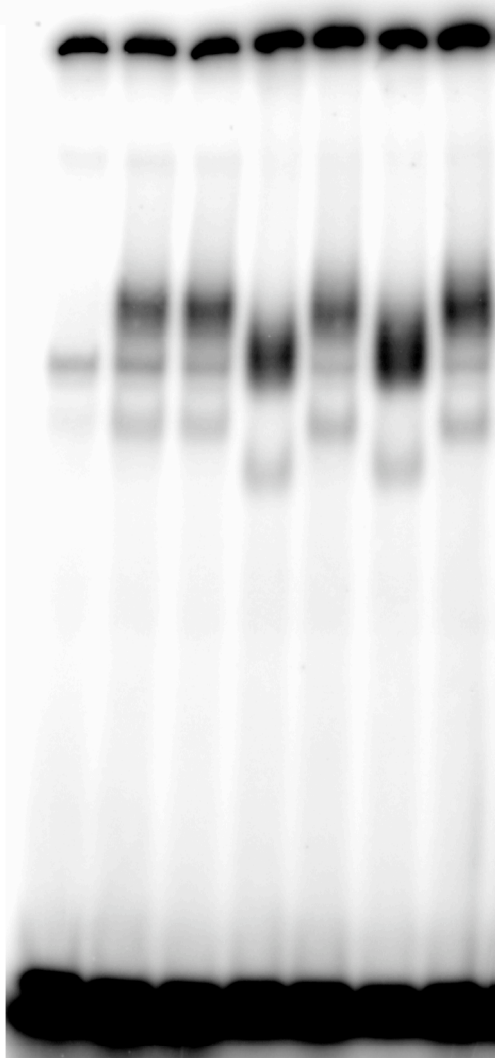

← NF-kB

← n.s.

← free oligonucleotide
